# Supplementary material
Source: publisher figshare collection journal article supplement (https://geolsoc.figshare.com/ndownloader/files/5424125)
Supplement: Supplementary file 1 [file 5424125]

Supplementary table 1: Zircon U–Pb LA-MC-ICP-MS data for metapelite sample UNG64 (N 11° 27.960’ E 77° 27.960’)
Analysis spot	Spot size	U	ƒ206%1,2		Isototopic ratios									Apparent ages (Ma)							Degree of concordance (%)
	(?m)	(ppm)			206Pb*/238U	±2?	207Pb*/235U	±2?	207Pb*/206Pb*	±2?	rho	206Pb*/204Pb*1		206Pb*/238U	±2?	207Pb*/235U	±2?	207Pb*/206Pb	±2?
UNG64-1-1	25	310	0.2		0.1846	0.004	1.943	0.068	0.0763	0.0020	0.65	10286		1092	23	1096	23	1103	53		99.0
UNG64-1-2	25	234	6.0		0.0785	0.002	0.625	0.057	0.0578	0.0051	0.25	295		487	11	493	36	522	195		93.3
UNG64-1-3	25	1350	2.5		0.0809	0.002	0.665	0.025	0.0596	0.0019	0.57	721		501	10	517	16	589	68		85.1
UNG64-2-1	25	91	<DL		0.4750	0.011	10.817	0.312	0.1652	0.0030	0.78	<DL		2505	47	2508	27	2509	30		99.8
UNG64-2-2	25	272	<DL		0.0978	0.002	0.829	0.027	0.0615	0.0016	0.65	<DL		601	12	613	15	656	54		91.7
UNG64-2-3	25	206	<DL		0.0861	0.002	0.696	0.028	0.0586	0.0019	0.62	<DL		532	13	536	17	554	69		96.1
UNG64-3-1	25	304	0.0		0.4633	0.009	10.357	0.276	0.1621	0.0030	0.71	84873		2454	39	2467	25	2478	32		99.0
UNG64-3-2	25	2283	16.2		0.1031	0.002	0.857	0.056	0.0603	0.0037	0.36	109		633	14	628	31	613	133		103.2
UNG64-3-3-12	12	609	6.1		0.0832	0.002	0.772	0.174	0.0673	0.0151	0.10	289		515	11	581	100	848	481		60.7
UNG64-4-1	25	470	0.0		0.4532	0.008	9.926	0.208	0.1588	0.0017	0.86	104463		2409	36	2428	19	2443	18		98.6
UNG64-4-2	25	188	<DL		0.0892	0.002	0.735	0.025	0.0598	0.0014	0.73	<DL		551	13	560	15	597	50		92.2
UNG64-7-1	25	125	<DL		0.2398	0.006	3.653	0.118	0.1105	0.0022	0.79	<DL		1386	32	1561	26	1808	36		76.7
UNG64-7-2-12	12	530	2.9		0.0839	0.003	0.645	0.060	0.0558	0.0048	0.37	622		519	17	505	37	443	194		117.2
UNG64-9-1	25	70	0.1		0.1578	0.004	1.534	0.065	0.0705	0.0024	0.59	20770		944	22	944	26	944	70		100.0
UNG64-9-2	25	521	0.0		0.0862	0.002	0.695	0.019	0.0585	0.0011	0.76	368789		533	11	536	12	548	40		97.3
UNG64-9-3	25	220	0.3		0.1384	0.004	1.278	0.049	0.0670	0.0016	0.77	4312		836	23	836	22	837	51		99.8
UNG64-10-1	25	285	0.0		0.2368	0.005	3.752	0.094	0.1149	0.0018	0.77	17808		1370	24	1583	20	1878	29		73.0
UNG64-10-2	25	386	0.3		0.2583	0.006	4.465	0.147	0.1254	0.0031	0.67	5338		1481	29	1724	27	2034	44		72.8
UNG64-10-3-12	12	872	1.2		0.0868	0.002	0.829	0.057	0.0692	0.0045	0.32	1536		537	11	613	32	905	135		59.3
UNG64-12-1	25	933	13.2		0.1036	0.002	1.524	0.082	0.1067	0.0052	0.43	120		635	14	940	33	1744	89		36.4
UNG64-12-2	25	251	2.8		0.0851	0.002	0.686	0.024	0.0585	0.0017	0.54	596		526	10	530	15	547	65		96.2
UNG64-13-1	25	353	0.0		0.4317	0.008	9.638	0.222	0.1619	0.0024	0.76	63425		2313	34	2401	21	2476	25		93.4
UNG64-13-2	25	174	0.1		0.1090	0.003	1.331	0.058	0.0885	0.0029	0.67	7120		667	18	859	25	1394	62		47.8
UNG64-16-1	25	184	1.1		0.0859	0.002	0.698	0.026	0.0589	0.0018	0.55	1085		531	11	538	16	564	68		94.1
UNG64-17-1	25	1746	1.2		0.1078	0.002	1.175	0.039	0.0791	0.0020	0.66	1308		660	14	789	18	1175	49		56.2
UNG64-17-2-12	12	531	1.2		0.0712	0.003	0.770	0.077	0.0785	0.0072	0.42	1451		443	18	580	44	1159	181		38.2
UNG64-19-1	25	28	0.5		0.1506	0.004	1.467	0.087	0.0706	0.0038	0.43	2541		904	21	917	36	947	110		95.4
UNG64-19-2-12	12	20	1.3		0.1501	0.016	1.438	0.213	0.0695	0.0073	0.70	317		901	88	905	89	913	218		98.7
UNG64-26-1	25	769	0.4		0.2401	0.007	4.618	0.173	0.1395	0.0033	0.77	3652		1387	36	1752	31	2221	42		62.5
UNG64-26-2	25	203	<DL		0.0956	0.002	0.833	0.027	0.0632	0.0016	0.62	<DL		589	12	615	15	713	55		82.5
UNG64-26-3	25	302	1.3		0.0821	0.004	0.713	0.059	0.0630	0.0040	0.64	1329		509	26	547	35	708	136		71.8
UNG64-27-1	25	49	<DL		0.1334	0.004	1.226	0.074	0.0667	0.0035	0.50	<DL		807	23	813	34	827	108		97.6
UNG64-27-2	25	344	<DL		0.0857	0.002	0.696	0.025	0.0590	0.0019	0.50	<DL		530	9	537	15	566	69		93.6
UNG64-28-1	25	174	<DL		0.1385	0.003	1.278	0.042	0.0669	0.0018	0.59	<DL		836	15	836	19	836	55		100.0
UNG64-28-2-12	12	654	2.4		0.0840	0.002	0.739	0.035	0.0638	0.0028	0.39	676		520	9	562	21	736	93		70.7
UNG64-30-1	25	771	0.0		0.4571	0.006	10.376	0.223	0.1646	0.0027	0.64	36698		2427	28	2469	20	2504	28		96.9
UNG64-30-2	25	421	2.8		0.1604	0.003	2.509	0.104	0.1134	0.0040	0.51	546		959	19	1275	30	1855	64		51.7
UNG64-30-3	25	300	<DL		0.0851	0.001	0.696	0.020	0.0593	0.0014	0.56	<DL		526	8	536	12	579	53		90.9
UNG64-31-1	25	117	0.0		0.1505	0.003	1.415	0.046	0.0682	0.0017	0.61	22193		904	16	895	19	875	53		103.3
UNG64-31-2	25	331	1.3		0.1005	0.002	0.890	0.029	0.0643	0.0017	0.60	1341		617	11	646	15	751	55		82.2
UNG64-31-3	25	348	0.6		0.0879	0.001	0.761	0.024	0.0628	0.0017	0.52	2586		543	9	575	14	700	58		77.6
UNG64-32-1	25	198	<DL		0.4641	0.008	10.260	0.224	0.1603	0.0021	0.81	<DL		2458	36	2459	20	2459	22		99.9
UNG64-32-2	25	496	<DL		0.4361	0.006	9.530	0.164	0.1585	0.0017	0.77	<DL		2333	26	2390	16	2440	19		95.6
UNG64-32-3-12	12	383	<DL		0.0779	0.002	0.699	0.038	0.0651	0.0028	0.59	<DL		484	15	538	23	777	92		62.2
UNG64-36-1	25	367	<DL		0.1511	0.002	1.534	0.034	0.0736	0.0012	0.70	<DL		907	13	944	14	1031	32		88.0
UNG64-36-2	25	1239	6.0		0.0802	0.002	0.675	0.028	0.0610	0.0020	0.61	297		498	12	524	17	639	71		77.9
UNG64-36-3	25	690	0.4		0.0817	0.002	0.688	0.021	0.0610	0.0013	0.73	3719		506	11	531	13	641	45		79.0
UNG64-41-1	25	98	0.1		0.1511	0.003	1.399	0.049	0.0672	0.0019	0.62	7887		907	18	888	21	843	58		107.6
UNG64-41-2	25	366	0.1		0.0928	0.002	0.802	0.025	0.0627	0.0013	0.76	11042		572	13	598	14	697	43		82.1
UNG64-42-1	25	186	0.0		0.4283	0.010	9.242	0.252	0.1565	0.0024	0.82	54182		2298	43	2362	25	2418	26		95.0
UNG64-42-2	25	443	0.6		0.0840	0.002	0.657	0.027	0.0567	0.0019	0.58	3041		520	12	513	16	480	73		108.3
UNG64-44-1	25	657	1.9		0.4496	0.010	9.708	0.247	0.1566	0.0020	0.87	752		2393	44	2407	23	2419	22		98.9
UNG64-44-2	25	131	0.2		0.0836	0.002	0.665	0.034	0.0577	0.0025	0.55	6814		518	14	517	21	517	95		100.0
UNG64-49-1	25	419	1.1		0.4458	0.011	9.470	0.283	0.1541	0.0024	0.85	1281		2377	50	2385	27	2392	27		99.4
UNG64-49-2	25	175	1.6		0.0935	0.003	0.747	0.052	0.0580	0.0037	0.40	1142		576	15	566	30	528	141		109.1
UNG64-54-1	25	348	4.2		0.0939	0.003	0.767	0.042	0.0592	0.0027	0.57	423		579	17	578	24	576	97		100.5
UNG64-54-2	25	83	0.9		0.1452	0.004	1.395	0.057	0.0697	0.0022	0.64	1833		874	21	887	24	919	64		95.1
1<DL is below detection limit
2fraction of total 206Pb that is common Pb
